# Supplementary material for: Development of a carbon dot and methylene blue NIR-emitting FLIM-FRET pair in niosomes for controlled ROS generation
Source: Royal Society of Chemistry journal article supplement (doi:10.1039/d2nr01032a), 2022-01-01
Supplement: d2nr01032a1.pdf [file d2nr01032a1.pdf]

## Electronic Supplementary Information

### Improvisation of luminescent carbon dots and methylene blue NIR-emitting FLIM-FRET pair in niosomes for controlled ROS generation

Arunavo Chatterjee, Ankit Kumar Sharma and Pradipta Purkayastha\*

Department of Chemical Sciences and Center for Advanced Functional Materials, Indian Institute of Science Education and Research (IISER) Kolkata, Mohanpur 741246, WB, India.

\*Email: ppurkayastha@iiserkol.ac.in

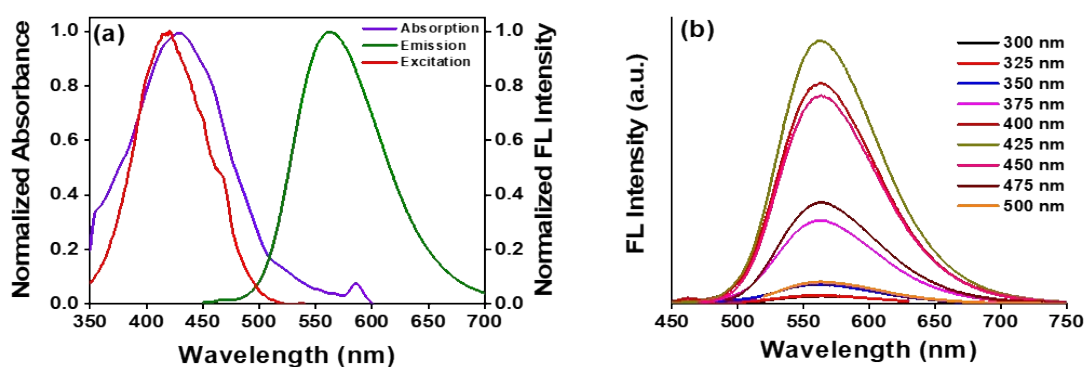

**Fig. S1.** (a) Absorption, steady state emission ( $\lambda_{\text{ex}} = 405$  nm) and photoluminescence excitation spectra ( $\lambda_{\text{em}} = 563$  nm), and (b) the excitation wavelength independent emission spectra of the YCDs in aqueous medium at 25 °C.

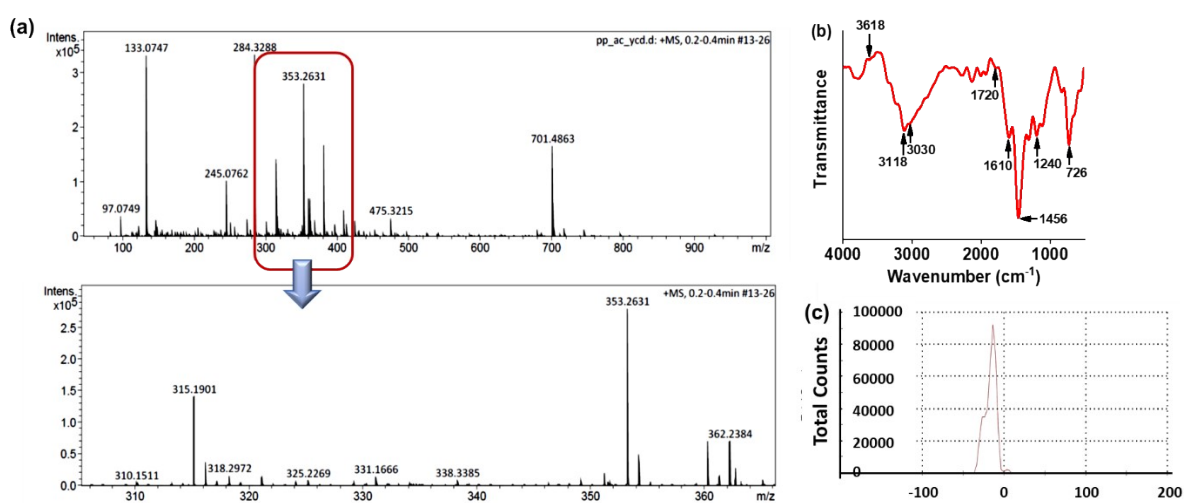

**Fig. S2.** (a) HRMS of the YCDs (up to m/z 1000) and magnified HRMS of YCDs (m/z 300-400), (b) FTIR spectrum, and (c) the zeta potential of the YCDs in aqueous solution at 25 °C.

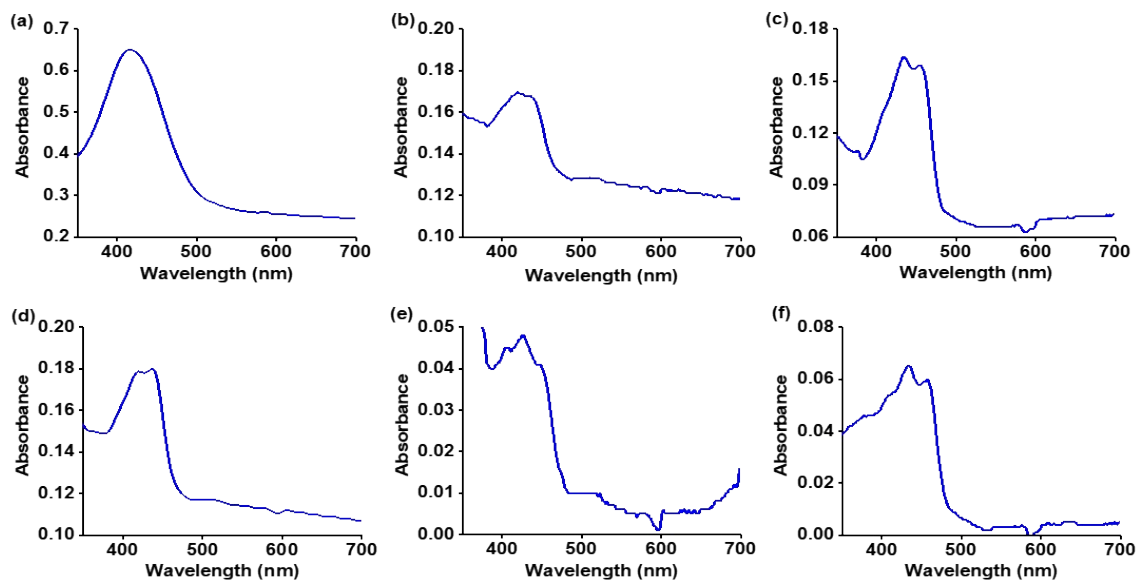

**Fig. S3.** Absorption spectra of the YCDs in (a) water, (b) acetonitrile, (c) ethanol, (d) acetone, (e) DMSO, and (f) and hexane at 25 °C.

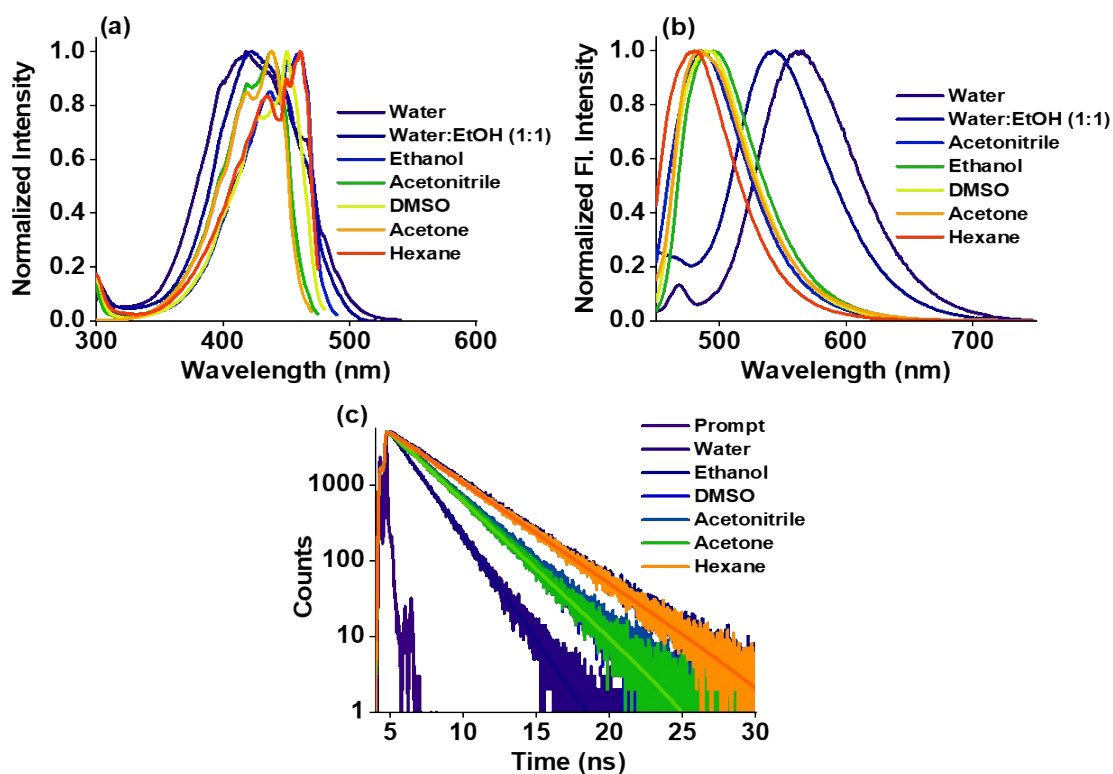

**Fig. S4.** Normalized (a) excitation ( $\lambda_{em} = 563\text{nm}$ ), and (b) emission ( $\lambda_{ex} = 405\text{ nm}$ ) spectra, and (c) the PL decays of the YCDs in different solvents at 25 °C

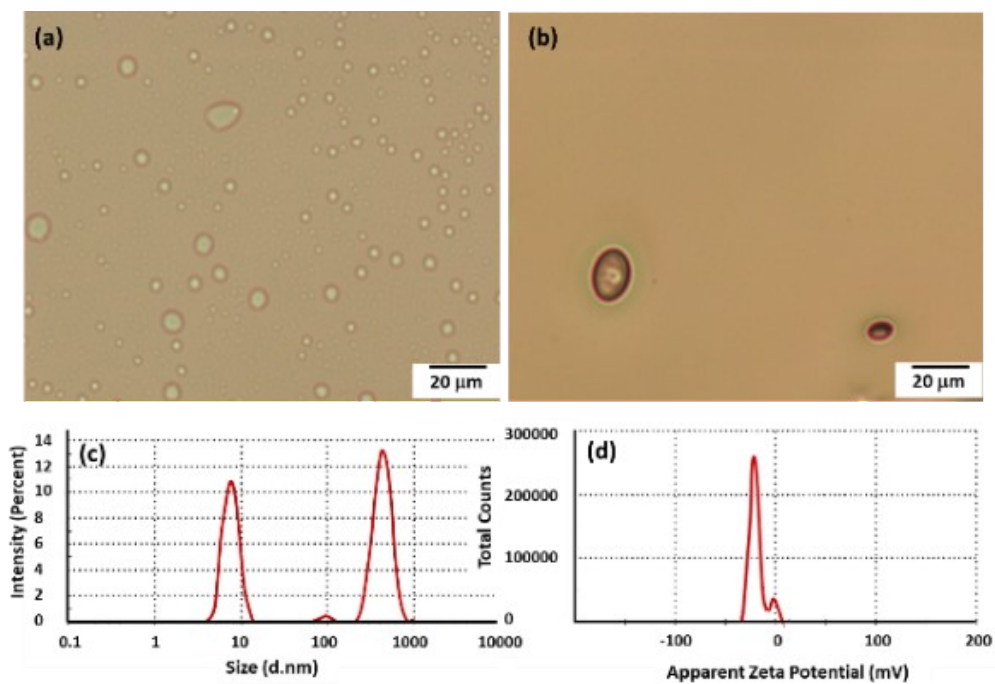

**Fig. S5.** (a, b) POM images, (c) size distribution (from DLS measurements), and (d) apparent zeta potential of the niosomes

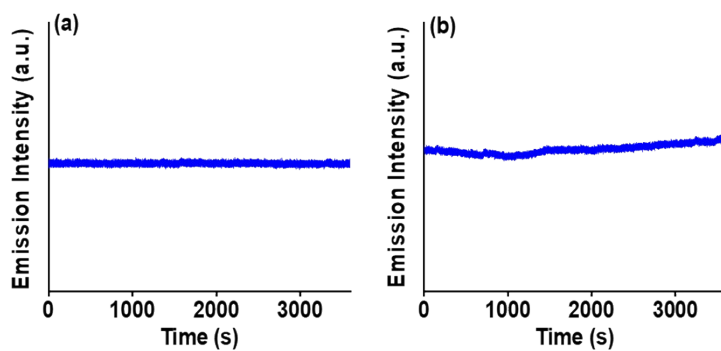

**Fig. S6.** Photostability of the YCDs in (a) bulk water and (b) niosomes.

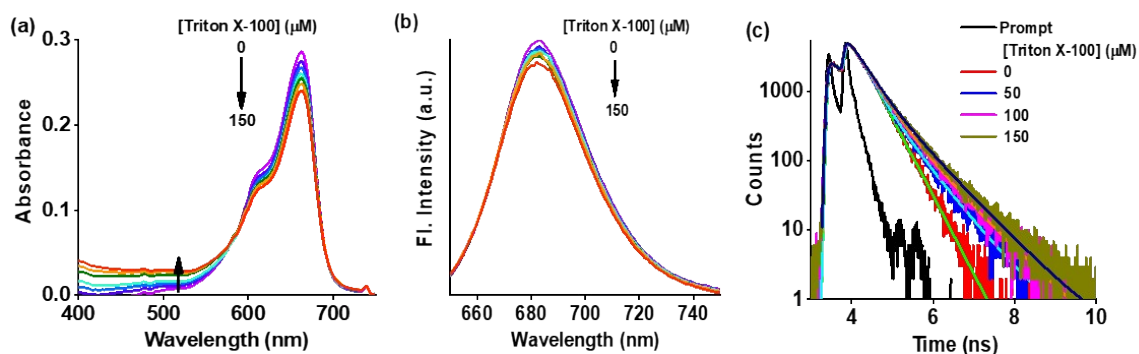

**Fig. S7.** (a) Changes in the absorption spectrum, and (b) fluorescence spectrum (630 nm excitation) and (c) PL decay of MB (6.25  $\mu\text{M}$ ) with gradual addition of niosomes in aqueous medium at 25  $^{\circ}\text{C}$ .

**Table S1.** Decay parameters of MB in presence of niosomes ( $\lambda_{\text{ex}} = 630 \text{ nm}$ ,  $\lambda_{\text{em}} = 690 \text{ nm}$ ). Values in the parentheses represent percentage contribution of each component and  $\chi^2$  provides the goodness of the fits.

| [Triton X-100]<br>( $\mu\text{M}$ ) | $\tau_1$ (ps) | $\tau_2$ (ps) | $\tau_3$ (ps) | $\tau_{\text{av}}$ (ps) | $\chi^2$ |
|-------------------------------------|---------------|---------------|---------------|-------------------------|----------|
| 0                                   | 102 (11)      | 381 (89)      | -             |                         | 1.20     |
| 50                                  | 70 (7)        | 314 (59)      | 633 (34)      | 480                     | 1.21     |
| 100                                 | 104 (11)      | 363 (63)      | 761 (26)      | 538                     | 1.21     |
| 150                                 | 117 (9)       | 391 (51)      | 739 (39)      | 586                     | 1.07     |

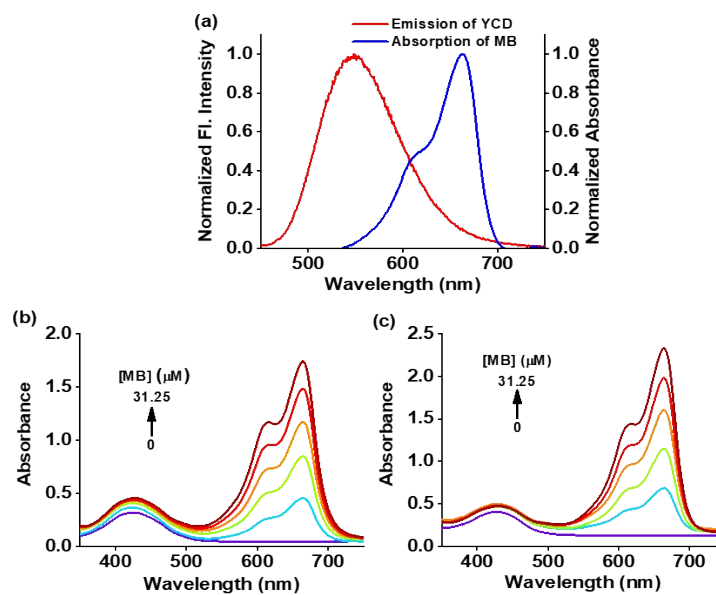

**Fig. S8.** (a) Overlap of the emission spectrum of YCD with the absorption spectrum of MB in aqueous medium; change in the absorption spectrum of YCD with gradual addition of MB (b) in bulk water and (c) in niosomes.

**Table S2.** FRET results between the YCDs and the MBs in aqueous solution.

| Condition      | J<br>( $M^{-1} cm^{-1} nm^4$ ) | $R_0$ (Å) | QY   | Efficiency of<br>quenching<br>due to $^1O_2$ | Rate constant of<br>quenching due to<br>$^1O_2$ ( $s^{-1}$ ) |
|----------------|--------------------------------|-----------|------|----------------------------------------------|--------------------------------------------------------------|
| Bulk<br>water  | $8.15 \times 10^{15}$          | 87.04     | 0.29 | 34 %                                         | $35.17 \times 10^8$                                          |
| in<br>niosomes | $9.77 \times 10^{13}$          | 50.38     | 0.91 | 30 %                                         | $4.72 \times 10^8$                                           |

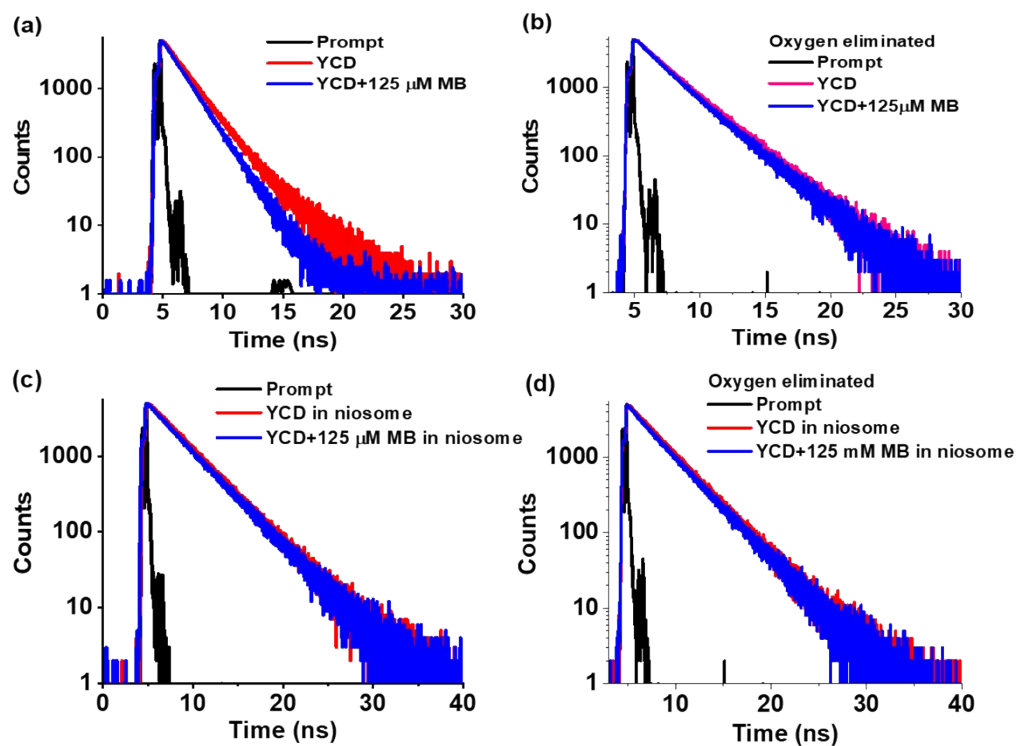

**Fig. S9.** Decay profiles of YCDs added with 125  $\mu\text{M}$  of MB (a and b) with and without dissolved oxygen in bulk aqueous medium, and (c and d) with and without dissolved oxygen in niosomes.
